# Supplementary material for: Synaptic processes and immune-related pathways implicated in Tourette syndrome
Source: PubMed Central journal article supplement (PMC7814139; doi:10.1038/s41398-020-01082-z), 2021-01-18
Supplement: 41398_2020_1082_MOESM1_ESM.pdf [file 41398_2020_1082_MOESM1_ESM.pdf]

"Synaptic processes and immune-related pathways  
implicated in Tourette Syndrome" by Tsetsos et al.

Supplemental material

| Eigenvector   | p-value     |
|---------------|-------------|
| Eigenvector 1 | 3.47946e-08 |
| Eigenvector 2 | 4.16711e-06 |
| Eigenvector 3 | 1.2927e-07  |
| Eigenvector 4 | 2.50729e-07 |
| Eigenvector 5 | 1.22125e-15 |

Supplementary Table 1: Significant eigenvectors according to the Tracy-Widom test employed by EIGENSOFT. Eigenvectors with p-value less than  $4.44e-6$  ( $0.05/N-1$  where  $N$  is the number of eigenvectors produced by PCA) are considered significant. In this analysis, the first five eigenvectors were significant and were used to correct for population structure.

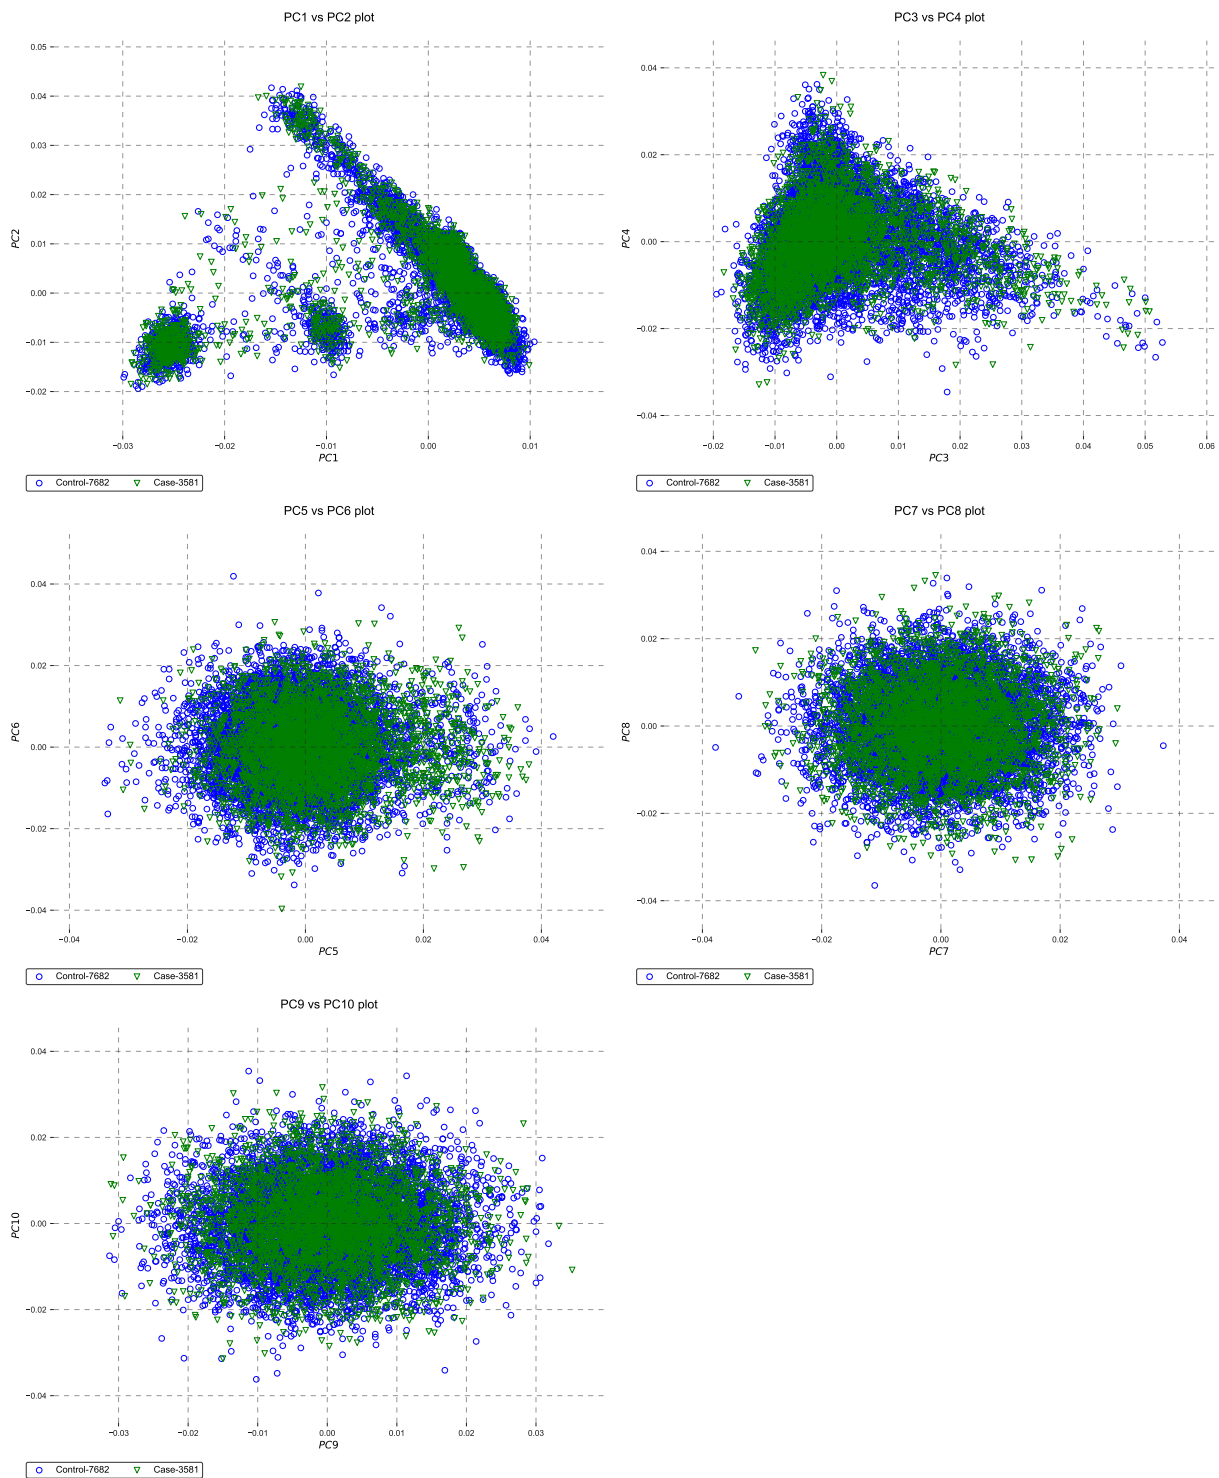

Supplementary Figure 1: Two-dimensional plots depicting the first 10 principal components produced by Principal Component Analysis. We can discern population structure up to the fifth principal component.
